# Supplementary material for: Unraveling the modification effect at NiOx/perovskite interfaces for efficient and stable inverted perovskite solar cells
Source: Royal Society of Chemistry journal article supplement (doi:10.1039/d3ta05069f), 2023-01-01
Supplement: d3ta05069f1.pdf [file d3ta05069f1.pdf]

## Electronic Supplementary Information

# Unraveling the Modification Effect at NiO<sub>x</sub>/perovskite interfaces for Efficient and Stable Inverted Perovskite Solar Cells

Xinxin Kang,<sup>a</sup> Dourong Wang,<sup>a</sup> Kun Sun,<sup>b</sup> Xue Dong,<sup>\*a</sup> Wei Hui,<sup>a</sup> Baohua Wang,<sup>a</sup> Lei Gu,<sup>a</sup> Maoxin Li,<sup>a</sup> Yaqi Bao,<sup>a</sup> Jie Zhang,<sup>a</sup> Renjun Guo,<sup>b</sup> Zerui Li,<sup>b</sup> Xiongzhuo Jiang,<sup>b</sup> Peter Müller-Buschbaum,<sup>bc</sup> Lin Song<sup>\*a</sup>

---

<sup>a</sup> *Frontiers Science Center for Flexible Electronics (FSCFE), Institute of Flexible Electronics (IFE), Northwestern Polytechnical University, 127 West Youyi Road, Xi'an 710072, P. R. China. E-mail: iamwhuang@nwpu.edu.cn; iamxdong@nwpu.edu.cn; iamsong@nwpu.edu.cn.*

<sup>b</sup> *Technical University of Munich, TUM School of Natural Sciences, Department of Physics, Chair for Functional Materials, James-Frank-Str. 1, 85748 Garching, Germany.*

<sup>c</sup> *Heinz Maier-Leibnitz Zentrum (MLZ), Technical University of Munich, Lichtenbergstr. 1, 85748 Garching, Germany.*

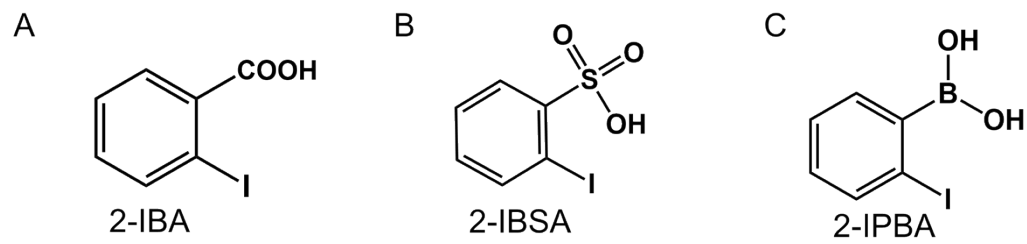

Figure S1. Chemical structures of (A) 2-IBA, (B) 2-IBSA and (C) 2-IPBA.

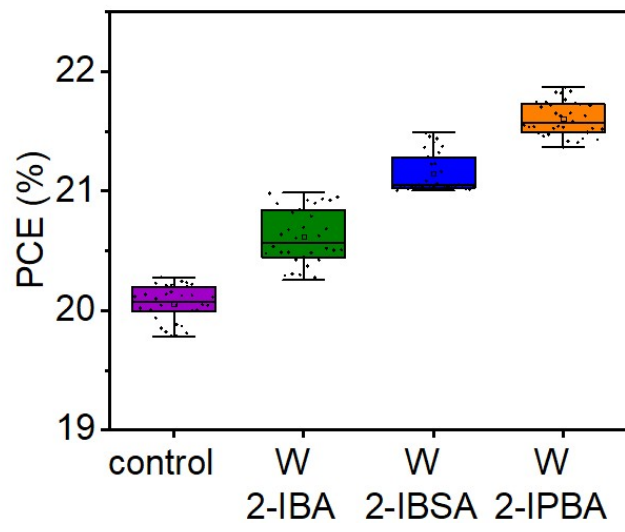

Figure S2. PCE statistics obtained from 35 individual control, 2-IBA, 2-IBSA and 2-IPBA modified PSCs.

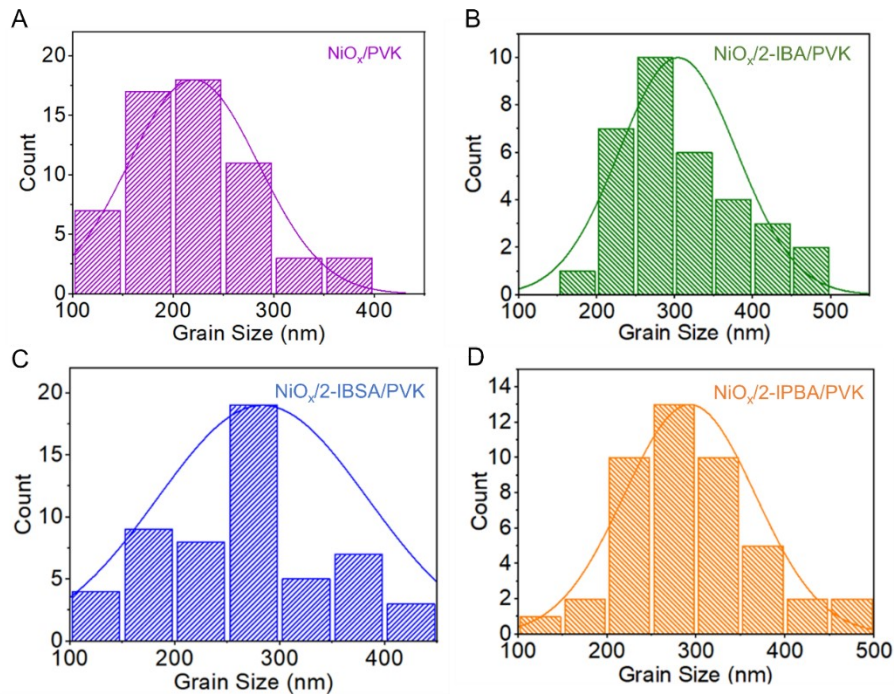

Figure S3. Size distributions of the perovskite grains deposited on (A)  $\text{NiO}_x$ , (B)  $\text{NiO}_x/2\text{-IBA}$ , (C)  $\text{NiO}_x/2\text{-IBSA}$  and (D)  $\text{NiO}_x/2\text{-IPBA}$ , respectively.

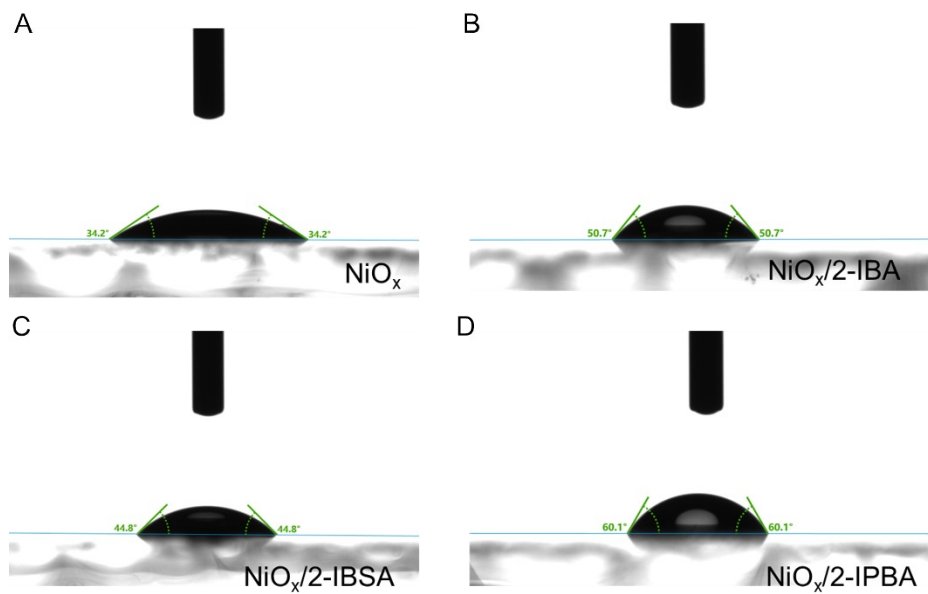

Figure S4. Contact angle testing for (A) the  $\text{NiO}_x$ , (B)  $\text{NiO}_x/2\text{-IBA}$ , (C)  $\text{NiO}_x/2\text{-IBSA}$  and (D)  $\text{NiO}_x/2\text{-IPBA}$  substrates.

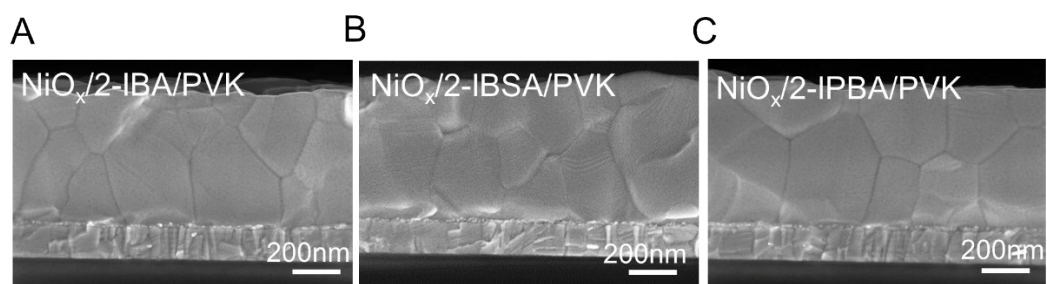

Figure S5. Cross-sectional SEM images of the perovskite films deposited on the (A) NiO<sub>x</sub>/2-IBA, (B) NiO<sub>x</sub>/2-IBSA and (C) NiO<sub>x</sub>/2-IPBA substrate.

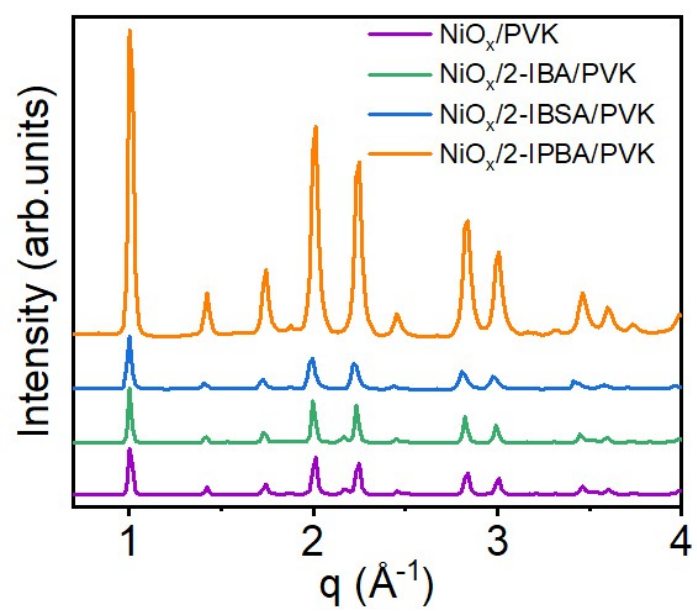

Figure S6. The sector-averaged integrals obtained from the 2D GIWAXS data for the perovskite films deposited on the NiO<sub>x</sub>, NiO<sub>x</sub>/2-IBA, NiO<sub>x</sub>/2-IBSA and NiO<sub>x</sub>/2-IPBA substrates.

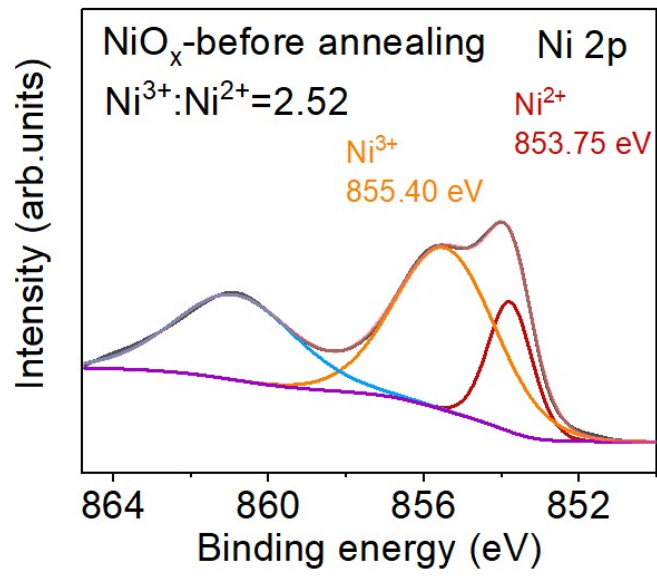

Figure S7. XPS spectra of Ni 2p for the NiO<sub>x</sub> film before thermal annealing.



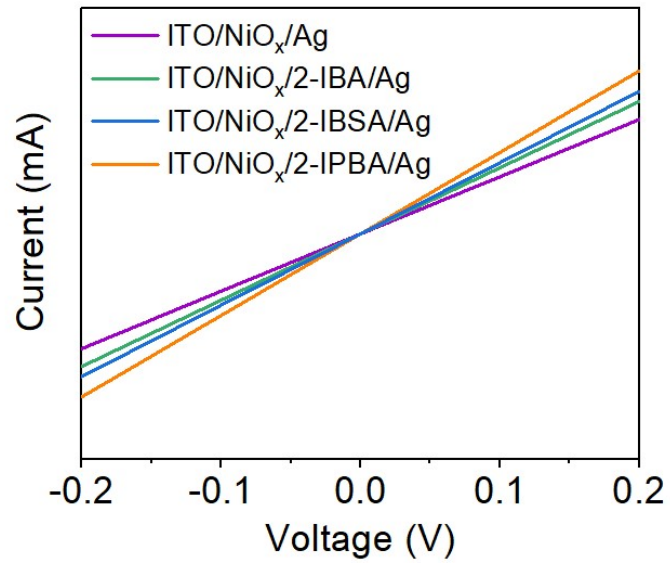

Figure S8. I-V curves of the NiO<sub>x</sub>, NiO<sub>x</sub>/2-IBA, NiO<sub>x</sub>/2-IBSA and NiO<sub>x</sub>/2-IPBA films, respectively.

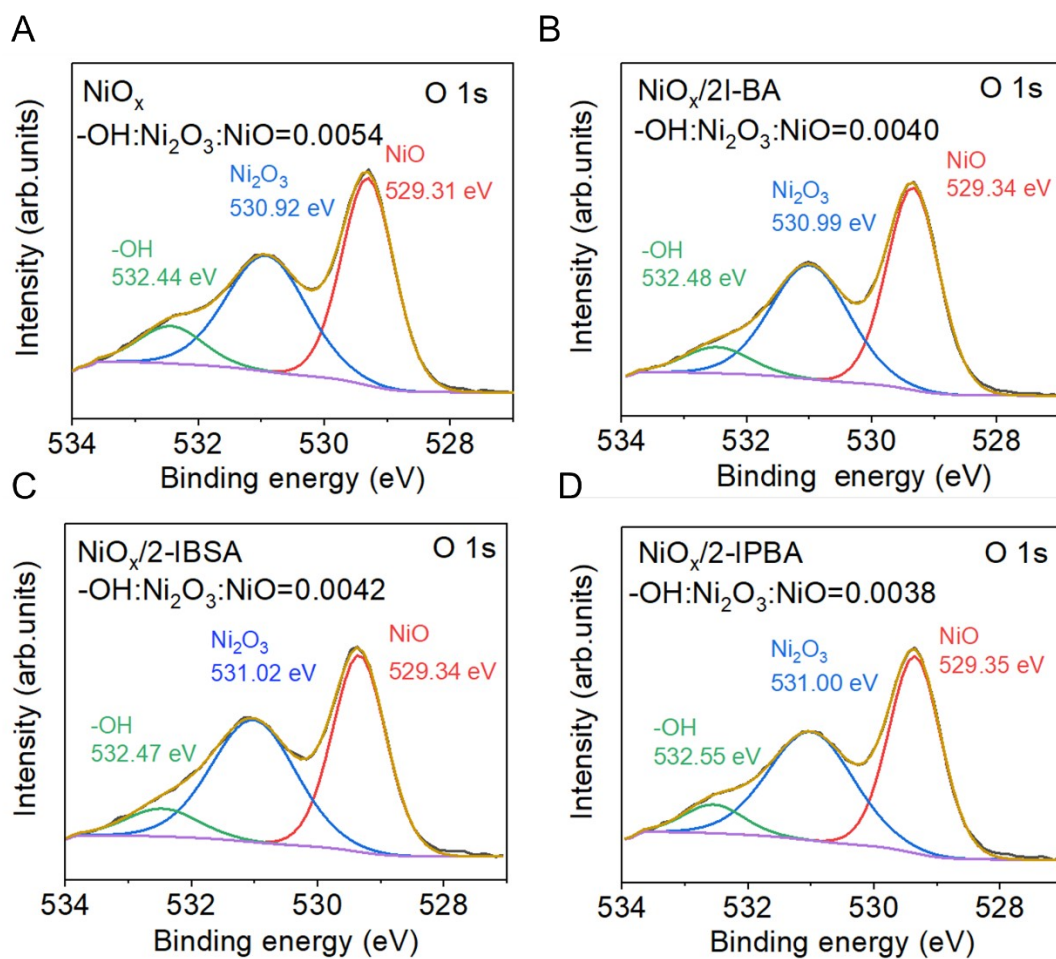

Figure S9. XPS spectra of O 1s for (A) the  $\text{NiO}_x$ , (B)  $\text{NiO}_x/2\text{I-BA}$ , (C)  $\text{NiO}_x/2\text{IBSA}$  and (D)  $\text{NiO}_x/2\text{IPBA}$  films.

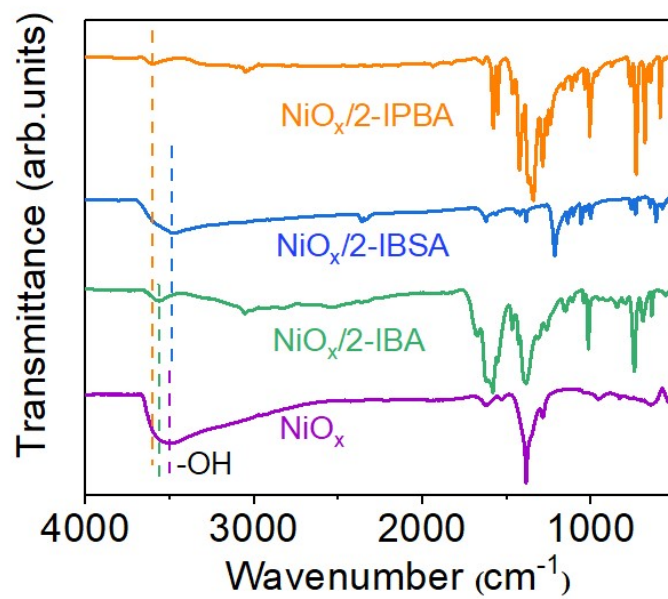

Figure S10. FT-IR spectra of the NiO<sub>x</sub>, NiO<sub>x</sub>/2-IBA, NiO<sub>x</sub>/2-IBSA and NiO<sub>x</sub>/2-IPBA films.

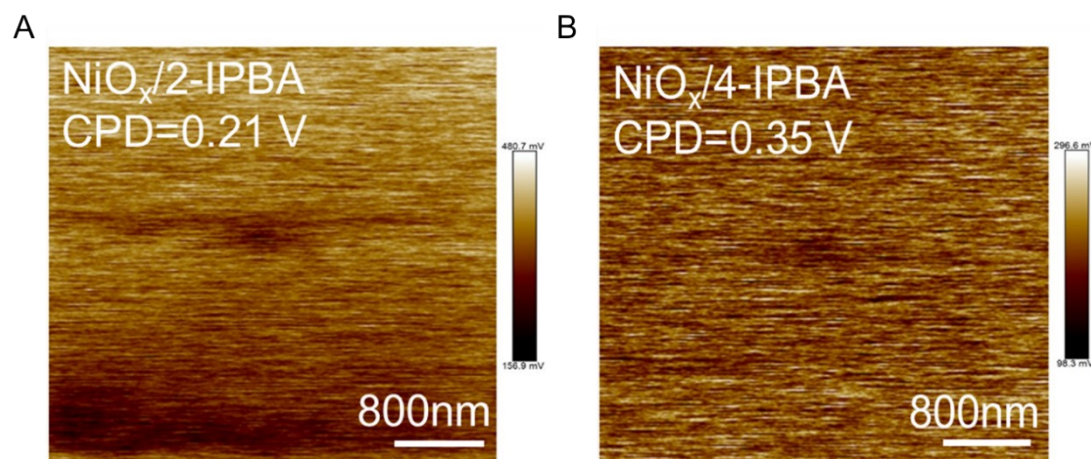

Figure S11. KPFM images of (A) the  $\text{NiO}_x/2\text{-IPBA}$  and (B)  $\text{NiO}_x/4\text{-IPBA}$  films.

A

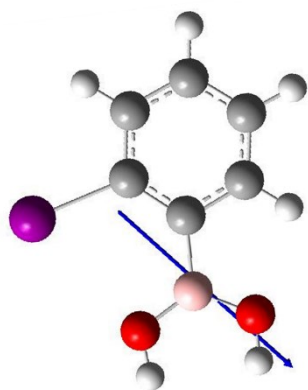

2-IPBA  
2.85D

B

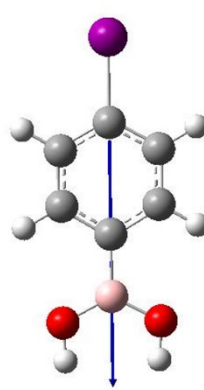

4-IPBA  
4.55D

Figure S12. Molecular structures and dipole moments of (A) 2-IPBA and (B) 4-IPBA molecules.

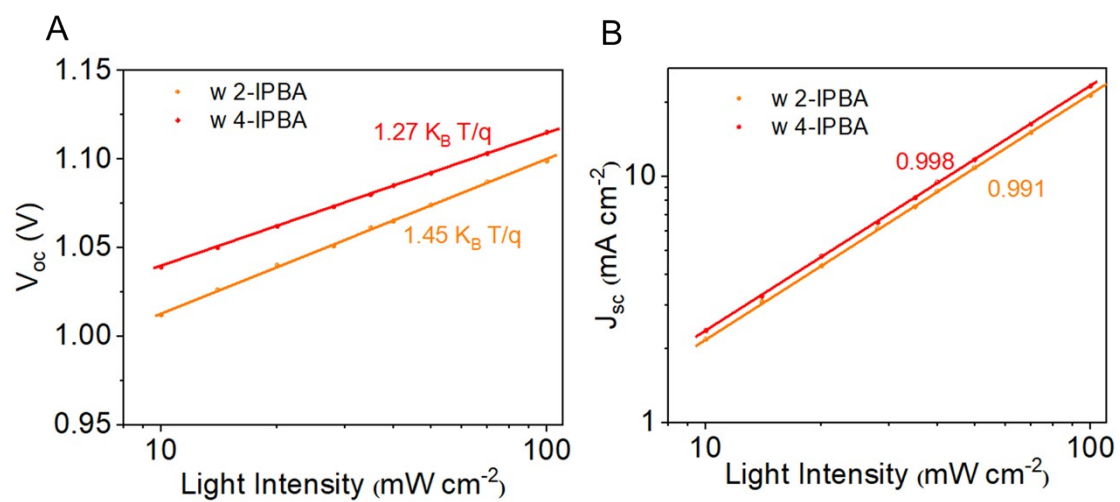

Figure S13. (A)  $V_{oc}$  and (B)  $J_{sc}$  versus light intensity of PSCs with the 2-IPBA and 4-IPBA modification.

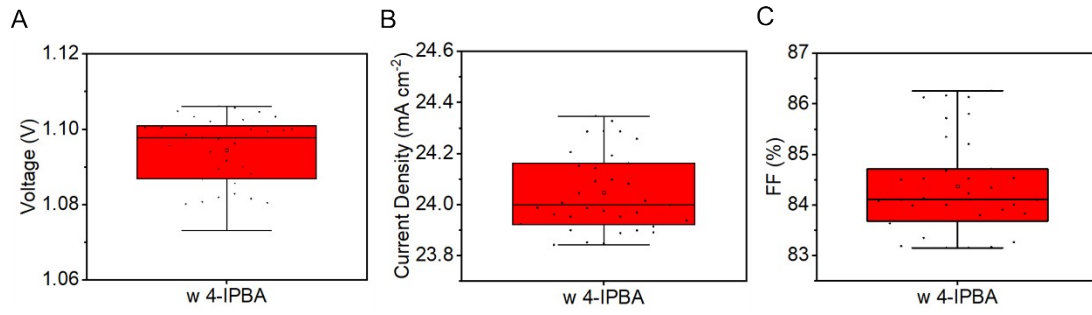

Figure S14. (A)  $V_{oc}$ , (B)  $J_{sc}$  and (C) FF statistics obtained from 35 PSCs with the 4-IPBA modification.

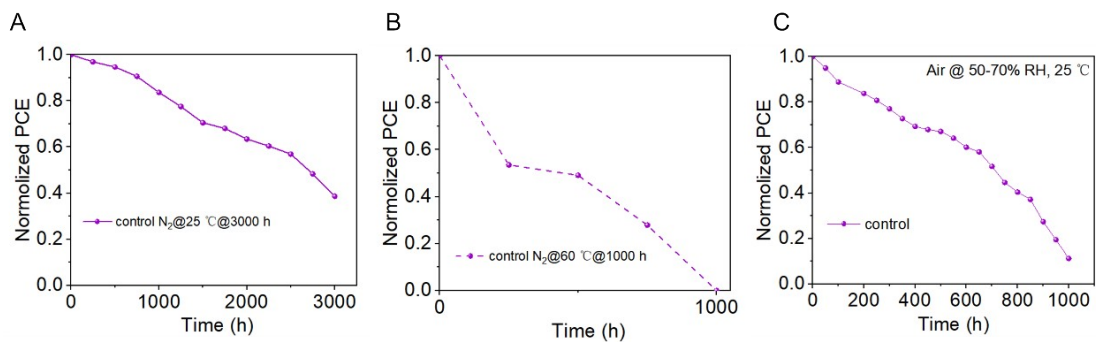

Figure S15. Normalized PCEs of the control device stored in (A)  $N_2$  atmosphere at  $25\text{ }^\circ\text{C}$  for 3000 h, (B)  $60\text{ }^\circ\text{C}$  for 1000 h and (C) air (RH of 50-70%,  $25\text{ }^\circ\text{C}$ ) for 1000 h.



Table S1. The average data collected out of 35 cells

|                 | <b>Voc (V)</b> | <b>Jsc (mA cm<sup>-2</sup>)</b> | <b>FF (%)</b> | <b>PCE (%)</b> |
|-----------------|----------------|---------------------------------|---------------|----------------|
| <b>control</b>  | 1.03±0.008     | 24.23±0.277                     | 79.89±1.324   | 20.06±0.148    |
| <b>W 2-IBA</b>  | 1.06±0.010     | 24.19±0.160                     | 80.93±0.144   | 20.61±0.236    |
| <b>W 2-IBSA</b> | 1.10±0.002     | 23.95±0.196                     | 80.32±0.206   | 21.20±0.166    |
| <b>W 2-IPBA</b> | 1.10±0.001     | 23.57±0.336                     | 82.08±0.709   | 21.70±0.140    |

Table S2. FWHM and DoO parameters from Figure 2E-H

| Samples                           |      | $\chi \approx 0$ | $\chi \approx 40$ | $\chi \approx 65$ |
|-----------------------------------|------|------------------|-------------------|-------------------|
| <b>NiO<sub>x</sub>/PVK</b>        | FWHM | 52.18            | 48.24             | 17.68             |
|                                   | DoO  | 2.34%            | 28.06%            | 11.20%            |
| <b>NiO<sub>x</sub>/2I-BA/PVK</b>  | FWHM | 34.41            | 31.81             | 41.76             |
|                                   | DoO  | 5.58%            | 30.38%            | 15.62%            |
| <b>NiO<sub>x</sub>/2I-BSA/PVK</b> | FWHM | 20.57            | 41.14             | 36.91             |
|                                   | DoO  | 6.21%            | 22.48%            | 10.64%            |
| <b>NiO<sub>x</sub>/2I-PBA/PVK</b> | FWHM | 8.37             | 43.66             | 42.76             |
|                                   | DoO  | 8.02%            | 18.58%            | 8.28%             |

Table S3. Fitted TRPL parameters from Figure 3C

| <b>Samples</b>                    | <b><math>\tau_1</math> (ns)</b> | <b><math>\tau_2</math> (ns)</b> | <b><math>A_1</math></b> | <b><math>A_2</math></b> | <b>ave. (ns)</b> |
|-----------------------------------|---------------------------------|---------------------------------|-------------------------|-------------------------|------------------|
| <b>NiO<sub>x</sub>/PVK</b>        | 20.75                           | 149.46                          | 39.84%                  | 60.16%                  | 98.18            |
| <b>NiO<sub>x</sub>/2I-BA/PVK</b>  | 20.14                           | 144.81                          | 40.43%                  | 59.57%                  | 94.41            |
| <b>NiO<sub>x</sub>/2I-BSA/PVK</b> | 19.76                           | 143.88                          | 38.34%                  | 61.66%                  | 96.29            |
| <b>NiO<sub>x</sub>/2I-PBA/PVK</b> | 19.38                           | 136.86                          | 37.41%                  | 62.59%                  | 92.91            |

Table S4. Binding energy and atomic ratios of pristine NiO<sub>x</sub>, NiO<sub>x</sub> with 2-IBA treatment, NiO<sub>x</sub> with 2-IBSA treatment, and NiO<sub>x</sub> with 2-IPBA from Figure 3D-G and Figure S6

| <b>Samples</b>                              | <b>Ni<sup>3+</sup> (eV)<br/>Ratio (%)</b> | <b>Ni<sup>2+</sup> (eV)<br/>Ratio (%)</b> | <b>Ni<sup>3+</sup>/ Ni<sup>2+</sup><br/>(%)</b> |
|---------------------------------------------|-------------------------------------------|-------------------------------------------|-------------------------------------------------|
| <b>NiO<sub>x</sub></b>                      | 855.42                                    | 853.75                                    | 3.05                                            |
|                                             | 51.32                                     | 16.82                                     |                                                 |
| <b>NiO<sub>x</sub>/2I-BA</b>                | 855.46                                    | 853.76                                    | 2.59                                            |
|                                             | 49.09                                     | 18.95                                     |                                                 |
| <b>NiO<sub>x</sub>/2I-BSA</b>               | 855.48                                    | 853.76                                    | 2.56                                            |
|                                             | 49.42                                     | 19.31                                     |                                                 |
| <b>NiO<sub>x</sub>/2I-PBA</b>               | 855.52                                    | 853.76                                    | 2.63                                            |
|                                             | 49.26                                     | 18.68                                     |                                                 |
| <b>NiO<sub>x</sub>/before<br/>annealing</b> | 855.40                                    | 853.75                                    | 2.52                                            |
|                                             | 53.53                                     | 21.27                                     |                                                 |

Table S5. Fitted TRPL parameters from Figure 4E

| <b>Samples</b>                    | <b><math>\tau_1</math> (ns)</b> | <b><math>\tau_2</math> (ns)</b> | <b>A<sub>1</sub></b> | <b>A<sub>2</sub></b> | <b>ave. (ns)</b> |
|-----------------------------------|---------------------------------|---------------------------------|----------------------|----------------------|------------------|
| <b>NiO<sub>x</sub>/4I-PBA/PVK</b> | 16.41                           | 137.80                          | 42.58%               | 57.42%               | 86.11            |

Table S6. Comparing the performance of PSCs based on halogenated phenyl acids-modified NiO<sub>x</sub> HTLs

| Modifiers                                                                    | Architecture                                                                                                                                                                                 | Performance                                                                                           | Ref              |
|------------------------------------------------------------------------------|----------------------------------------------------------------------------------------------------------------------------------------------------------------------------------------------|-------------------------------------------------------------------------------------------------------|------------------|
| 4-iodo-2,3,5,6-tetrafluorobenzoic acid (I-TFBA)                              | ITO/NiO <sub>x</sub> /I-TFBA/<br>Cs <sub>0.05</sub> (FA <sub>0.92</sub> MA <sub>0.08</sub> ) <sub>0.95</sub><br>Pb(I <sub>0.92</sub> Br <sub>0.08</sub> ) <sub>3</sub> /PEAI/PCBM<br>/BCP/Ag | V <sub>oc</sub> =1.17 V<br>J <sub>sc</sub> =22.3 mA cm <sup>-2</sup><br>FF=82.2%<br>PCE=22.02%        | 1                |
| p-chlorobenzenesulfonic acid (CBSA)                                          | ITO/NiO <sub>x</sub> /CBSA/ MAPbI <sub>3</sub> /<br>PCBM/BCP/Ag                                                                                                                              | V <sub>oc</sub> =1.11 V<br>J <sub>sc</sub> =23.23 mA cm <sup>-2</sup><br>FF=80.17%<br>PCE=20.7%       | 2                |
| Br-benzoic acid (Br-BA)                                                      | ITO/NiO <sub>x</sub> /Br-BA/MAPbI <sub>3</sub> /<br>PCBM/C <sub>60</sub> /Ag                                                                                                                 | V <sub>oc</sub> =1.11 V<br>J <sub>sc</sub> =21.7 mA cm <sup>-2</sup><br>FF=76.3%<br>PCE=18.4%         | 3                |
| 4-bromobenzoic acid                                                          | ITO/NiO <sub>x</sub> /4Br-BA/ FAMAPbI <sub>3</sub> /<br>PCBM/C <sub>60</sub> /Ag                                                                                                             | V <sub>oc</sub> =1.01 V<br>J <sub>sc</sub> =19.8 mA cm <sup>-2</sup><br>FF=64%<br>PCE=12.6%           | 4                |
| 4-bromobenzylphosphonic acid                                                 | ITO/NiO <sub>x</sub> /4-Br-BPPA/<br>CsFAMAPbBr <sub>3</sub> I <sub>3</sub> / PCBM/Ag                                                                                                         | V <sub>oc</sub> =1.09 V<br>J <sub>sc</sub> =18.58 mA cm <sup>-2</sup><br>FF=67.18%<br>PCE=12.73%      | 5                |
| [2-(3,6-Dimethoxy-9H-carbazol-9-yl)ethyl]phosphonic Acid+4-Bromobenzoic acid | ITO/NiO <sub>x</sub> /MeO-2PACz+Br-BA/PVK/ PEA/ C <sub>60</sub> /SnO <sub>2</sub> /Ag                                                                                                        | V <sub>oc</sub> =1.05 V<br>J <sub>sc</sub> =23.40 mA cm <sup>-2</sup><br>FF=83%<br>PCE=20.38%         | 6                |
| <b>2-iodobenzoic acid (2-IBA)</b>                                            | <b>ITO/NiO<sub>x</sub>/2-IBA/<br/>Cs<sub>0.05</sub>(FA<sub>0.98</sub>MA<sub>0.02</sub>)<sub>0.95</sub><br/>Pb(I<sub>0.98</sub>Br<sub>0.02</sub>)<sub>3</sub>/PCBM<br/>/BCP/Ag</b>            | <b>V<sub>oc</sub>=1.06 V<br/>J<sub>sc</sub>=24.20 mA cm<sup>-2</sup><br/>FF=80.81%<br/>PCE=20.77%</b> | <b>This Work</b> |
| <b>2-iodobenzenesulfonic acid (2-IBSA)</b>                                   | <b>ITO/NiO<sub>x</sub>/2-IBSA/<br/>Cs<sub>0.05</sub>(FA<sub>0.98</sub>MA<sub>0.02</sub>)<sub>0.95</sub><br/>Pb(I<sub>0.98</sub>Br<sub>0.02</sub>)<sub>3</sub>/PCBM<br/>/BCP/Ag</b>           | <b>V<sub>oc</sub>=1.10 V<br/>J<sub>sc</sub>=23.95 mA cm<sup>-2</sup><br/>FF=80.97%<br/>PCE=21.37%</b> | <b>This Work</b> |
| <b>2-iodophenylboronic acid (2-IPBA)</b>                                     | <b>ITO/NiO<sub>x</sub>/2-IPBA/<br/>Cs<sub>0.05</sub>(FA<sub>0.98</sub>MA<sub>0.02</sub>)<sub>0.95</sub><br/>Pb(I<sub>0.98</sub>Br<sub>0.02</sub>)<sub>3</sub>/PCBM<br/>/BCP/Ag</b>           | <b>V<sub>oc</sub>=1.10 V<br/>J<sub>sc</sub>=23.76 mA cm<sup>-2</sup><br/>FF=82.9%<br/>PCE=21.81%</b>  | <b>This Work</b> |
| <b>4-iodophenylboronic acid (4-IPBA)</b>                                     | <b>ITO/NiO<sub>x</sub>/4-IPBA/<br/>Cs<sub>0.05</sub>(FA<sub>0.98</sub>MA<sub>0.02</sub>)<sub>0.95</sub><br/>Pb(I<sub>0.98</sub>Br<sub>0.02</sub>)<sub>3</sub>/PCBM<br/>/BCP/Ag</b>           | <b>V<sub>oc</sub>=1.08 V<br/>J<sub>sc</sub>=24.42 mA cm<sup>-2</sup><br/>FF=86.18%<br/>PCE=22.91%</b> | <b>This Work</b> |

## Notes and references

1. C. Zhang, X. Shen, M. Chen, Y. Zhao, X. Lin, Z. Qin, Y. Wang, L. Han, *Adv. Energy Mater.*, 2023, **13**, 2203250.
2. J. Zhang, J. Yang, R. Dai, W. Sheng, Y. Su, Y. Zhong, X. Li, L. Tan, Y. Chen, *Adv. Energy Mater.*, 2022, **12**, 2103674.
3. Q. Wang, C. C. Chueh, T. Zhao, J. Cheng, M. Eslamian, W. C. H. Choy and A. K. Y. Jen, *Chemsuschem*, 2017, **10**, 3794-3803.
4. H. Anizelli, T. W. David, P. Tyagi, E. Laureto, J. Kettle, *Sol. Energy*, 2020, **203**, 157.
5. J. Mangalam, T. Rath, S. Weber, B. Kunert, T. Dimopoulos, A. Fian, G. Trimmel, *J. Mater. Sci.: Mater. Electron.* 2019, **30**, 9602.
6. G. Xie, M. Ma, D. Yang, H. Yang, Y. Zeng, Y. Ma, S Wu, C. Liu, Y. Mai, *Chinese J. Lumin*, 2023, 44(6): 1023.
